# Supplementary material for: Au atom tailoring of palladium nanocatalysts to boost cathodic coupling of carbon dioxide and methanol into dimethyl carbonate
Source: Royal Society of Chemistry journal article supplement (doi:10.1039/d5ta02317c), 2025-01-01
Supplement: d5ta02317c1.pdf [file d5ta02317c1.pdf]

Electronic Supplementary Information

**Au Atom Tailoring of Palladium Nanocatalysts to Boost Cathodically Coupling of Carbon Dioxide and Methanol into Dimethyl Carbonate**

Xue-Han Guan <sup>a, 1</sup>, Ke-An Wang <sup>a, 1</sup>, Zhen-Long Wang <sup>a, 1</sup>, Huan-Chuan Hu <sup>a</sup>, Biao Feng <sup>c</sup>, Li-Jun Yang <sup>c</sup>, Hai-Bin Zhu <sup>a, \*</sup>, Hui Yang <sup>b, \*</sup>

<sup>a</sup> *School of Chemistry and Chemical Engineering, Southeast University, 211189 Nanjing, China*

<sup>b</sup> *Shanghai Advanced Research Institute, Chinese Academy of Sciences, 201210 Shanghai, China*

<sup>c</sup> *Key Laboratory of Mesoscopic Chemistry of MOE and Jiangsu Provincial Laboratory for Nanotechnology, School of Chemistry and Chemical Engineering, Nanjing University, 210023 Nanjing, China*

---

\* To whom correspondence should be addressed. E-mail: zhuhabin@seu.edu.cn (H.-B. Zhu)

\* To whom correspondence should be addressed. E-mail: yangh@sari.ac.cn (H. Yang)

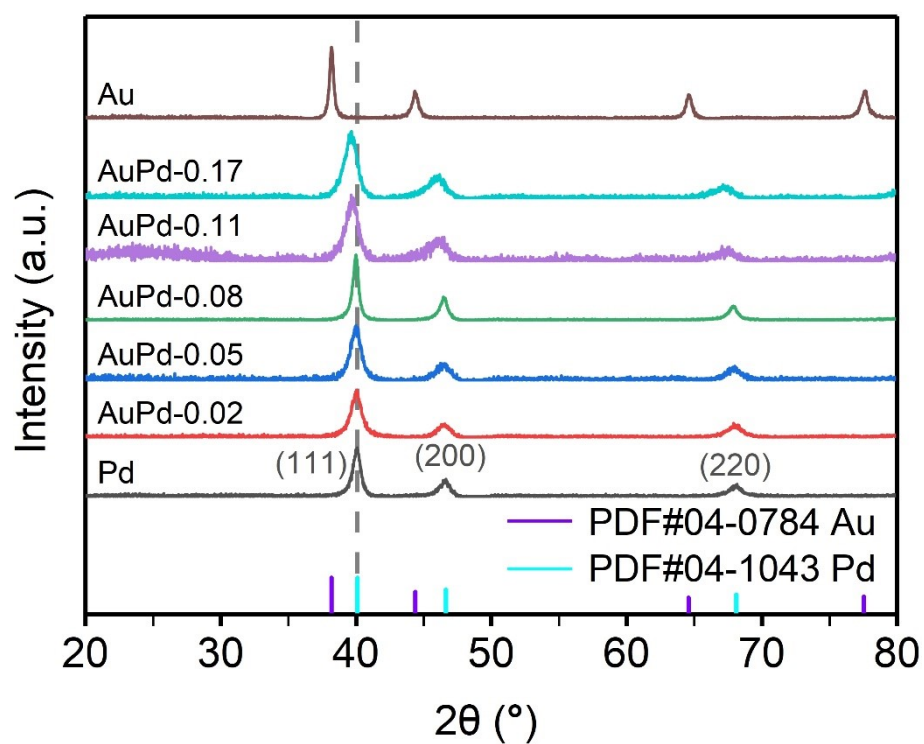

**Figure S1.** PXRD spectra of AuPd-x, Au NPs and Pd NPs.

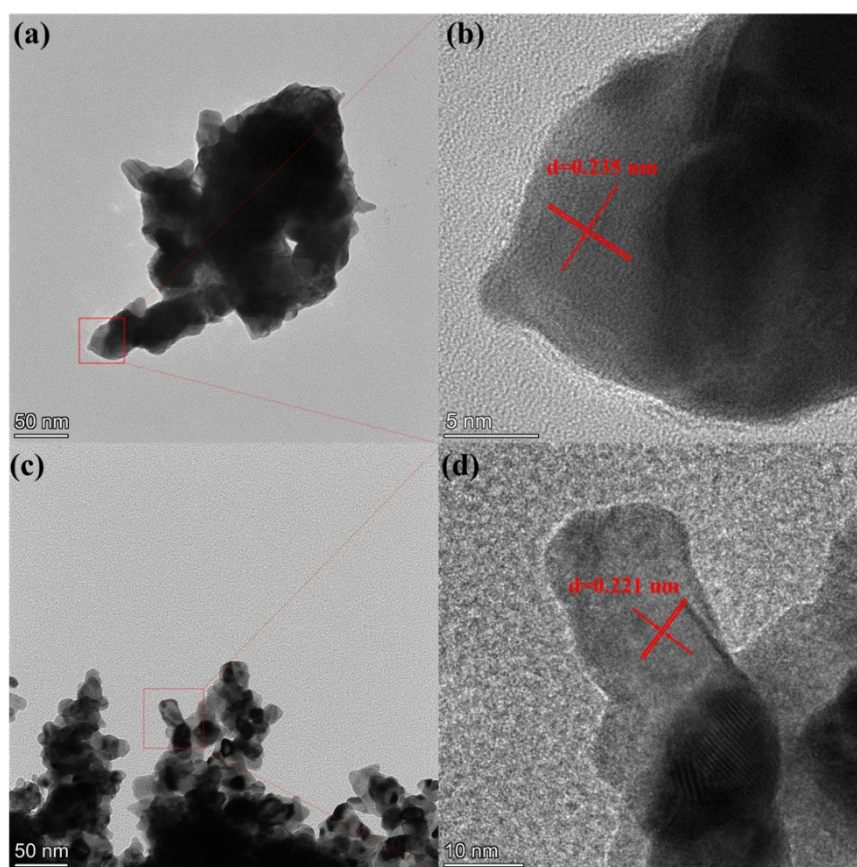

**Figure S2.** (a-b) TEM images of Pd NPs; (c-d) TEM images of Au NPs.

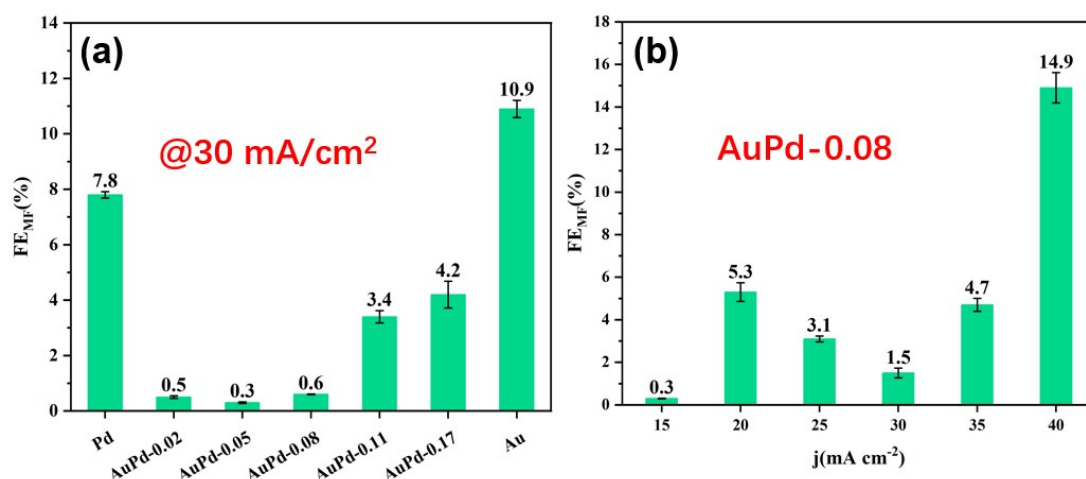

**Figure S3.** (a) FE of MF with AuPd-x, Pd and Au NPs at 30 mA/cm<sup>2</sup>; (b) FE of MF with AuPd-0.08 at different current density.

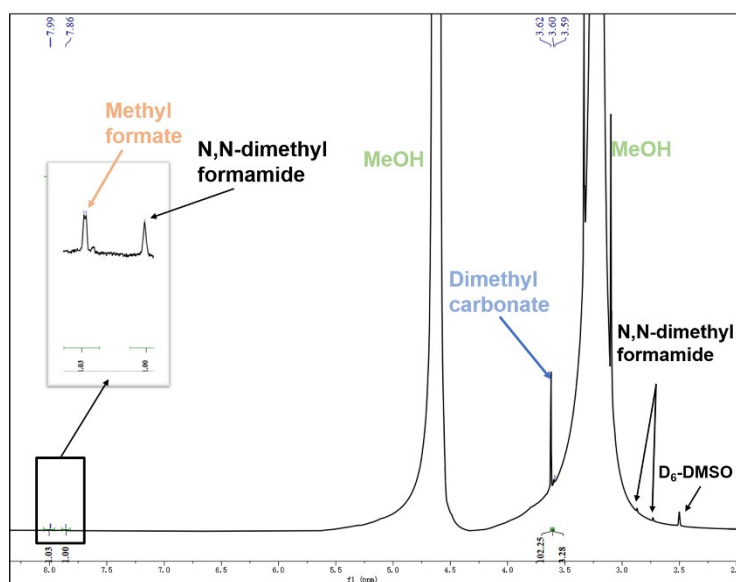

**Figure S4.** <sup>1</sup>H-NMR spectra of electrolyte with DMF as the internal standard.

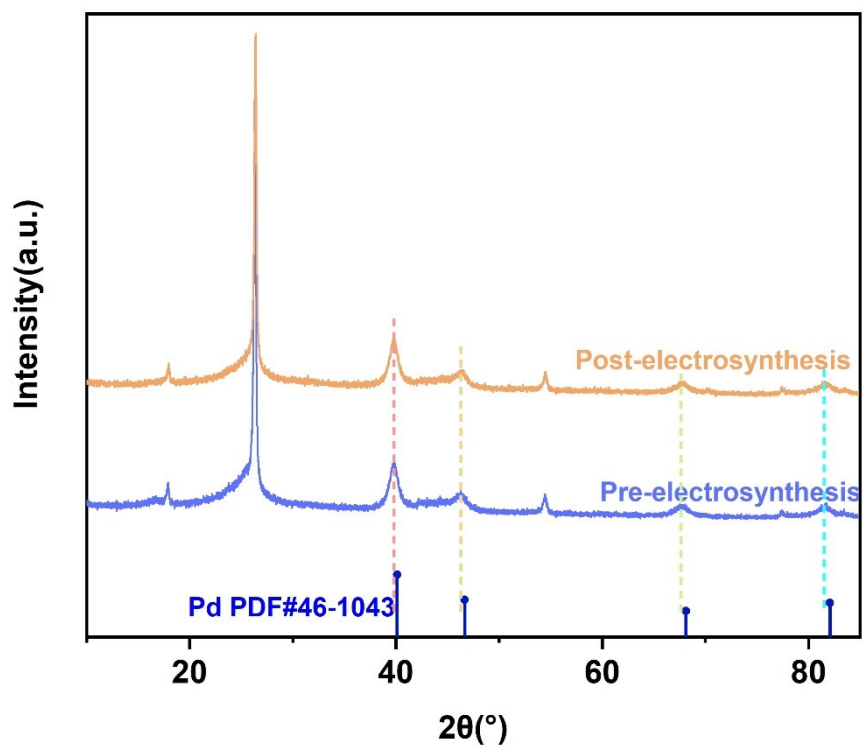

**Figure S5.** PXRD spectra of AuPd-0.08 loaded on carbon paper before and after electrolysis.

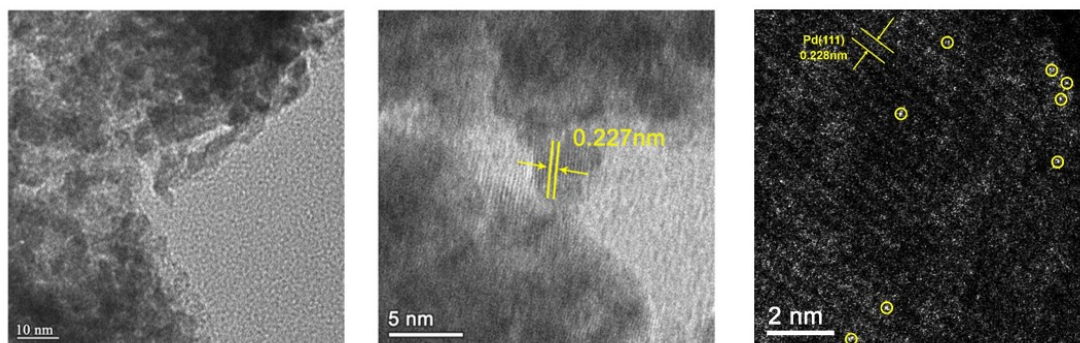

**Figure S6.** TEM images of AuPd-0.08 after electrolysis.

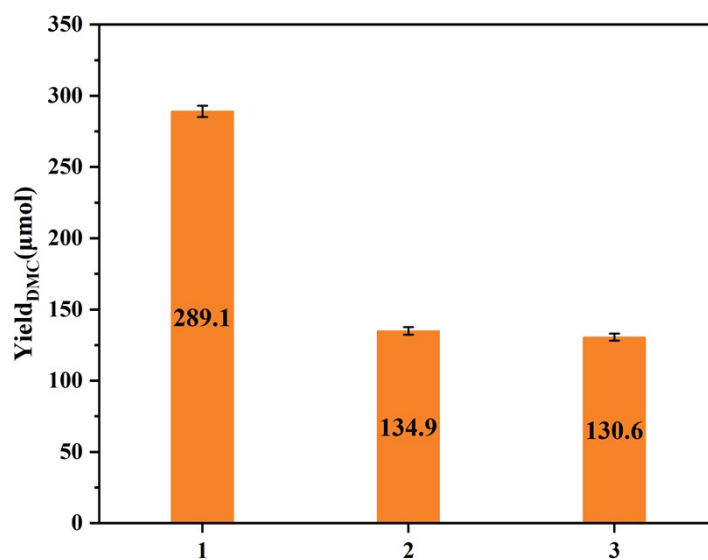

**Figure S7.** Evaluating the effect of the dissolved metal on DMC performance. 1: electrolysis under optimal reaction conditions for 1 hr. 2: electrolysis under optimal reaction conditions for 30 min. 3: AuPd-0.08 is used as the cathode for electrolysis for 30 minutes, and then replaced with Au foil cathode to continue electrolysis for 30 minutes.

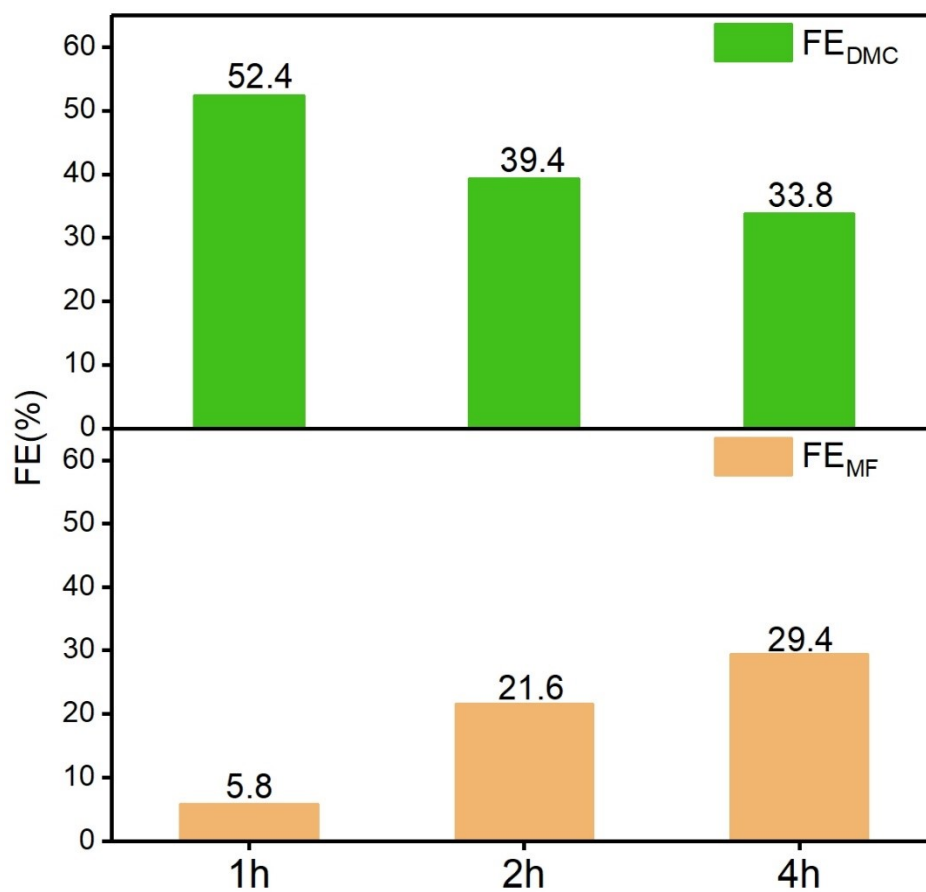

**Figure S8.** (a) DMC performance of AuPd-0.08 after 2 hrs and 4hrs (upper), and carbon paper stability test showing an increasing MF production with the time (lower).

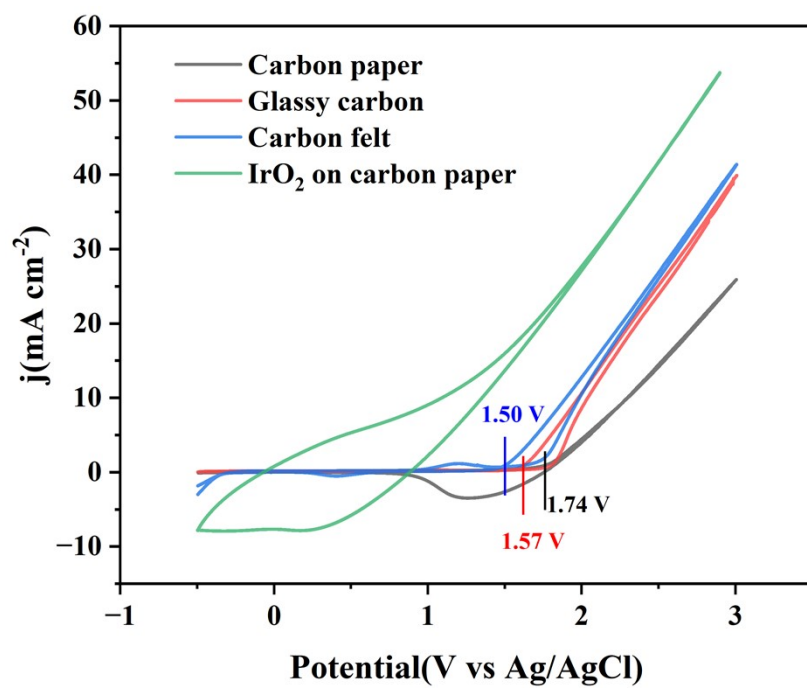

**Figure S9.** CV tests on different anode materials in 0.1 M NaBF<sub>4</sub> methanol solution.

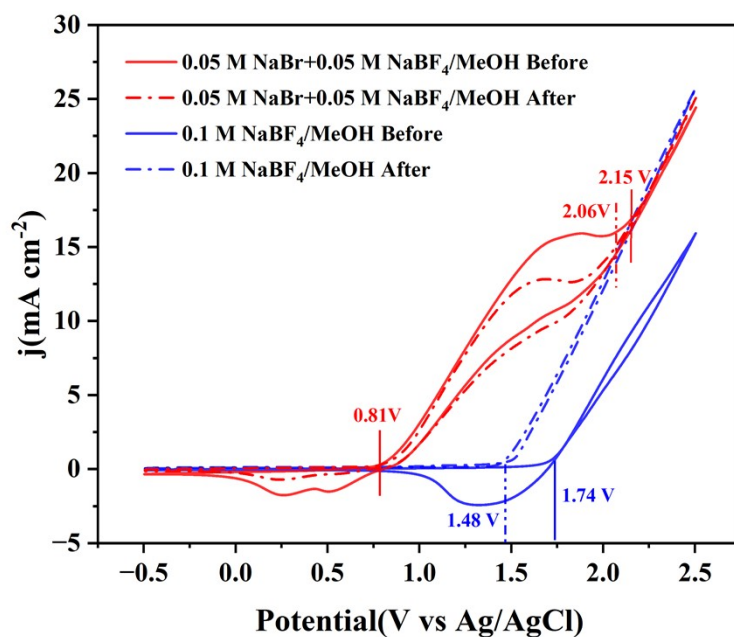

**Figure S10.** CV tests of CP in 0.1 M NaBF<sub>4</sub> methanol solution and 0.05 M NaBF<sub>4</sub>+0.05 M NaBr methanol solution before and after 2-hr DMC electrolysis.

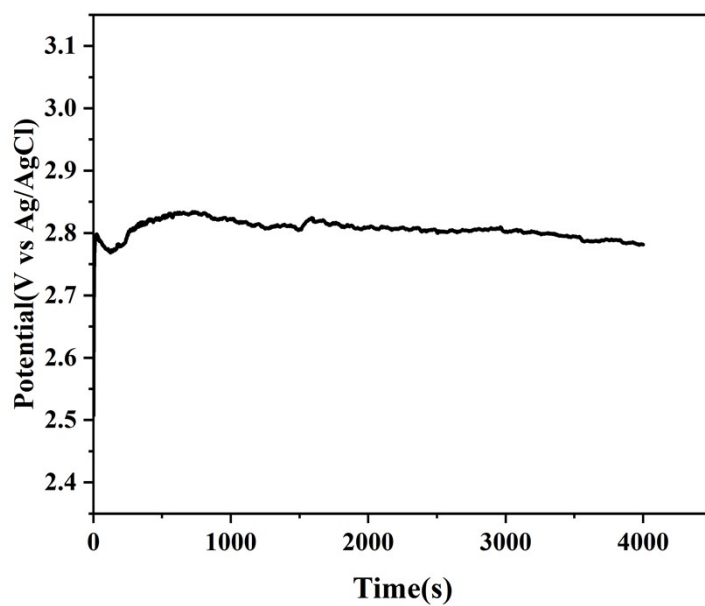

**Figure S11.** Monitoring the applied potential of CP anode during DMC electrosynthesis @ 30 mA/cm<sup>2</sup>.



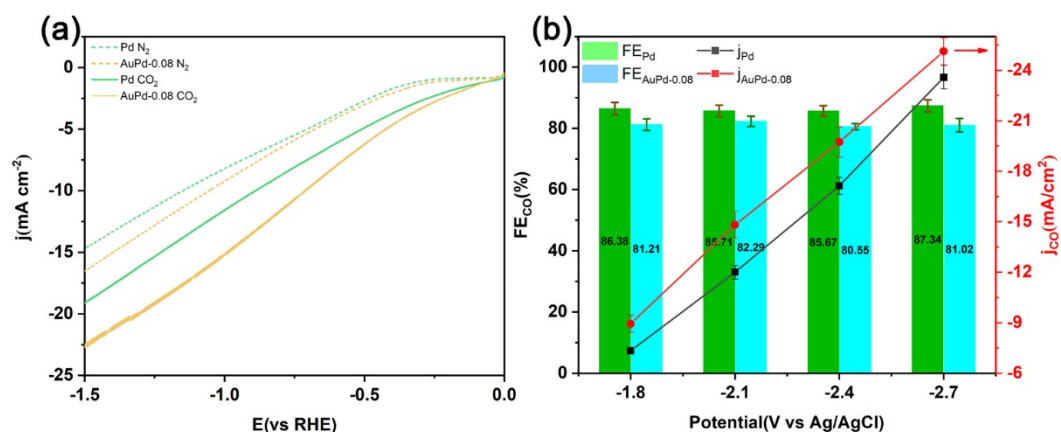

**Figure S12.** (a) LSV plots of Pd NPs and AuPd-0.08 under N<sub>2</sub> and CO<sub>2</sub> atmospheres.

(b) Comparison of FE and partial current density of CO between Pd NPs and AuPd-0.08.

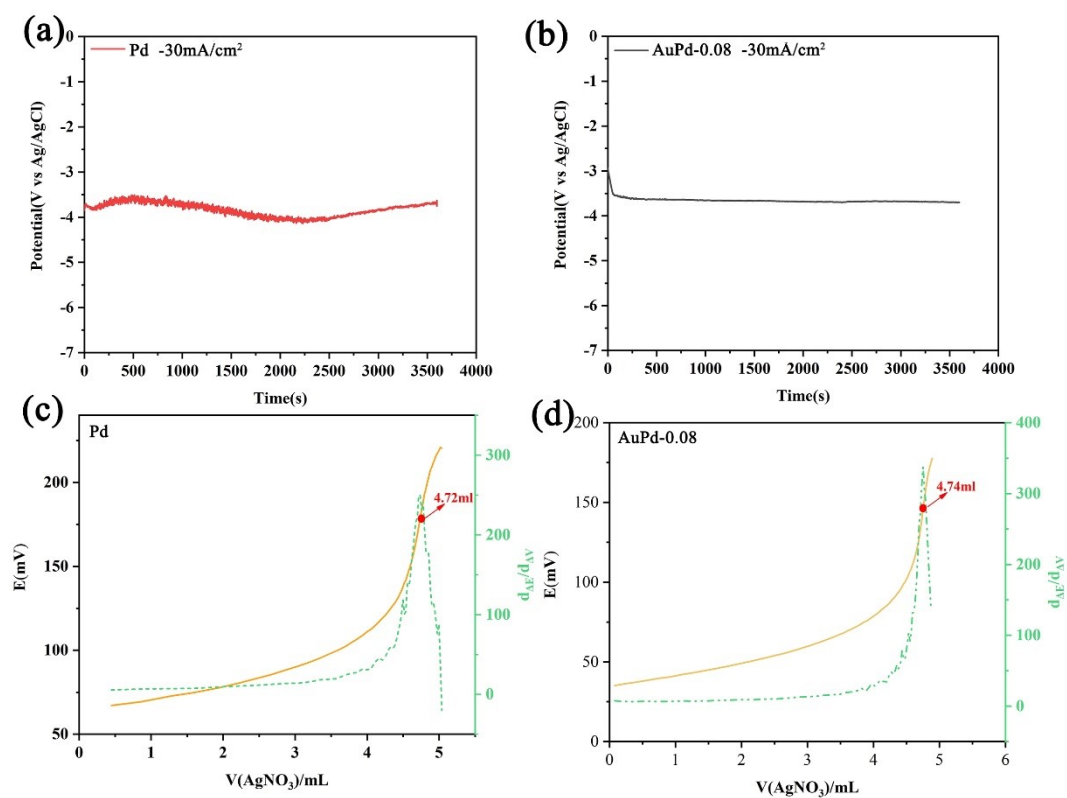

**Figure S13.** (a-b) Cathode potential of AuPd-0.08 and Pd NPs; (c-d) Br<sub>2</sub> concentration for AuPd-0.08 and Pd NPs.

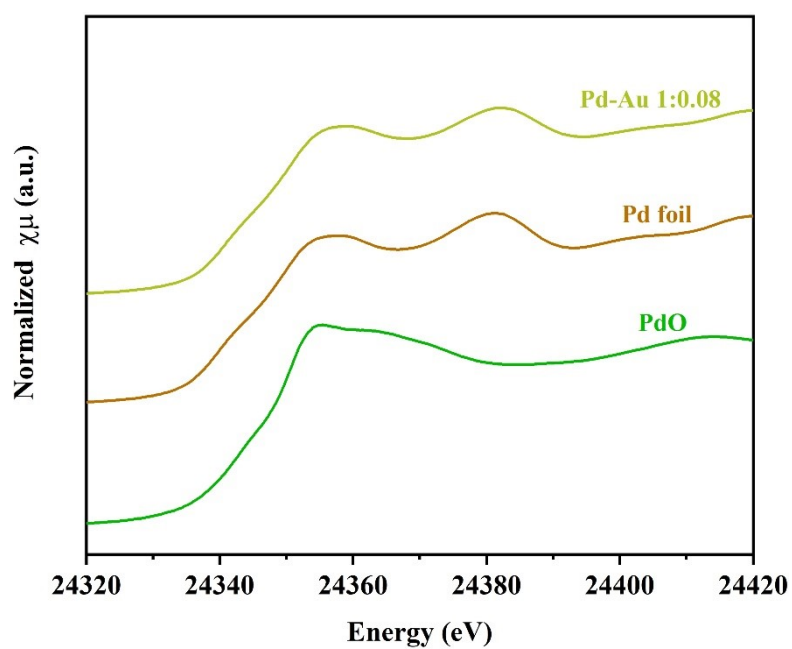

**Figure S14.** Pd k-edge XANES spectra of Pd foil, PdO, and AuPd-0.08.

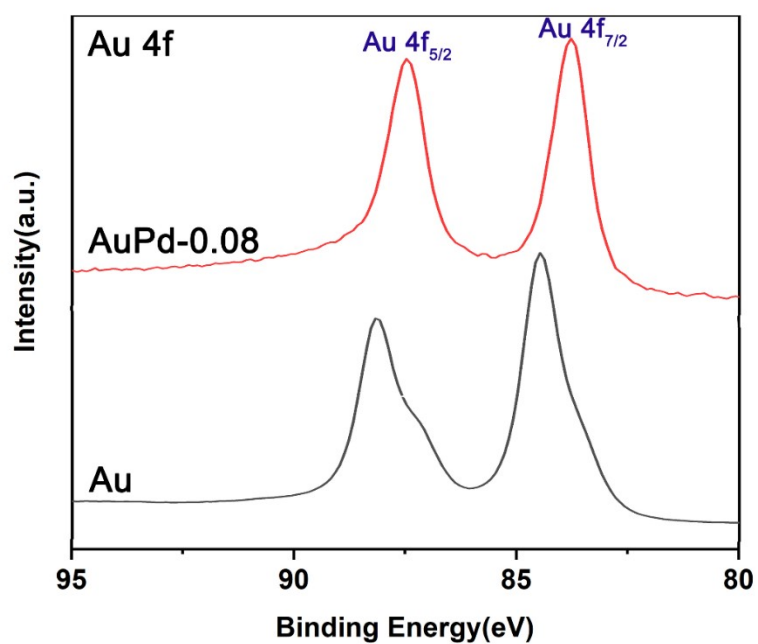

**Figure S15.** XPS spectra of Au 4f in AuPd-0.08 and Au.

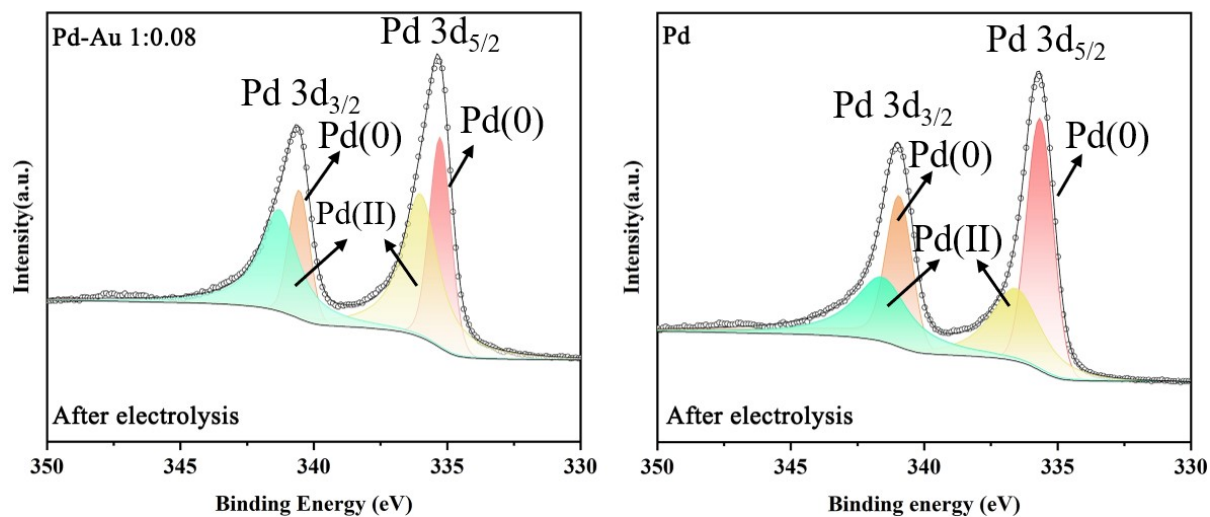

**Figure S16.** Pd 3d XPS spectra of (a) AuPd-0.08, and (b) Pd NPs.

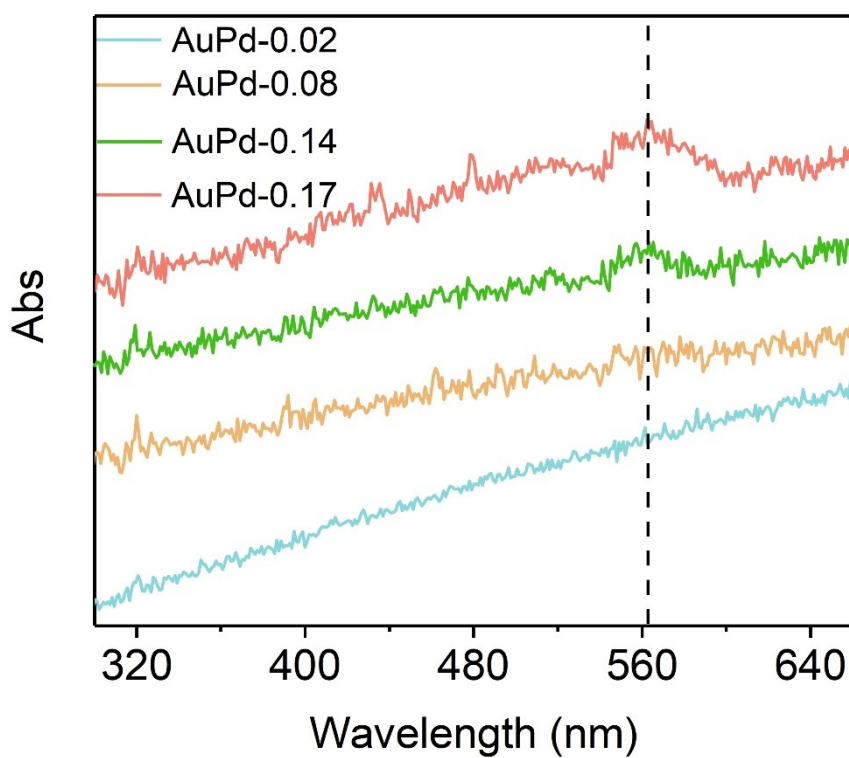

**Figure S17.** UV-Vis absorption spectra of AuPd-x (x = 0.02, 0.08, 0.14 and 0.17).

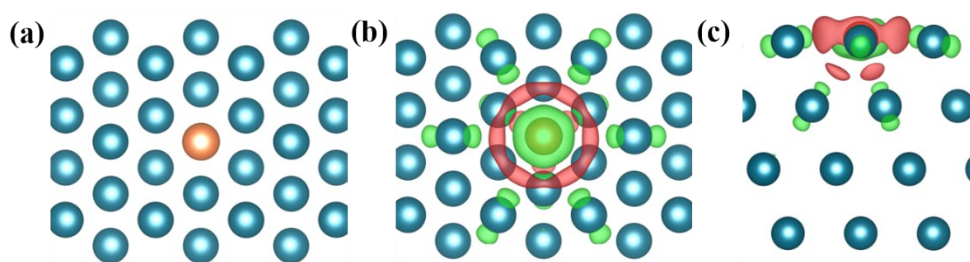

**Figure S18.** (a) Structure of Au single atom doped on Pd(111) surface. Orange and cyan balls represent gold and palladium, respectively. (b) and (c) are the top and side view of the charge density difference of Au single atom doped on Pd(111) surface, where green and red isosurfaces represent electron depletion and accumulation, and the isosurface unit was electrons per cubic angstrom ( $\text{e}^-/\text{\AA}^3$ ) and the levels were set as 0.0035.

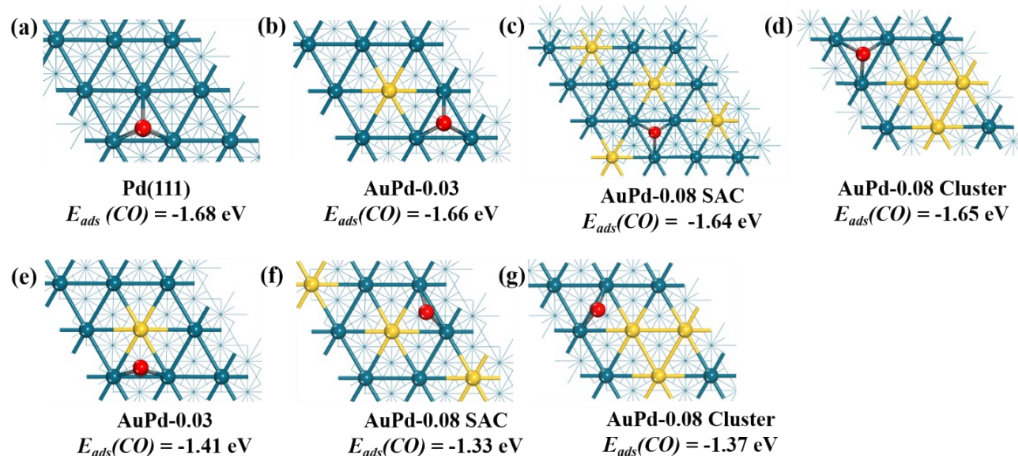

**Figure S19.** (a-d) Structure of Au single atom doped on Pd(111) surface. Orange and cyan balls represent gold and palladium, respectively. (e-g) Bridge adsorption configurations of CO on different doping surfaces.

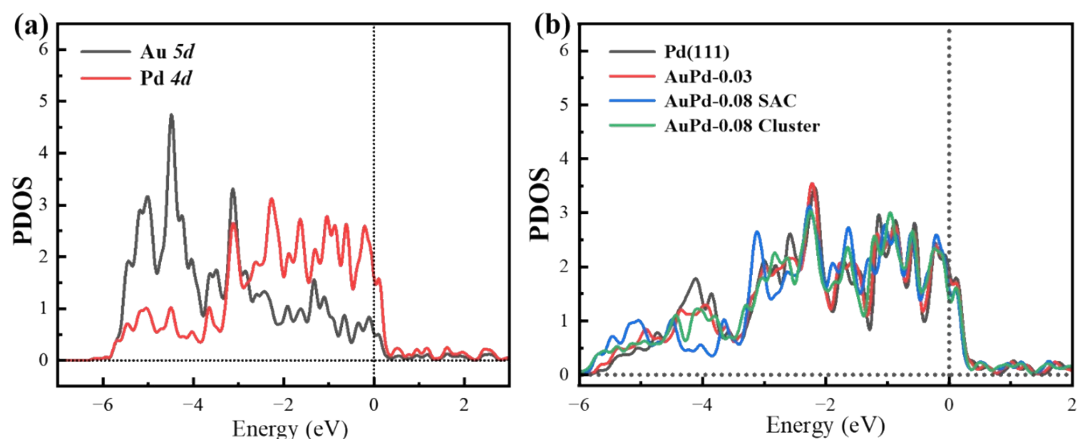

**Figure S20.** (a) The PDOS of d-band for AuPd-0.08 SAC. (b) The PDOS of d-band of Pd in Pd(111), AuPd-0.03, AuPd-0.08 SAC and AuPd-0.08 cluster.

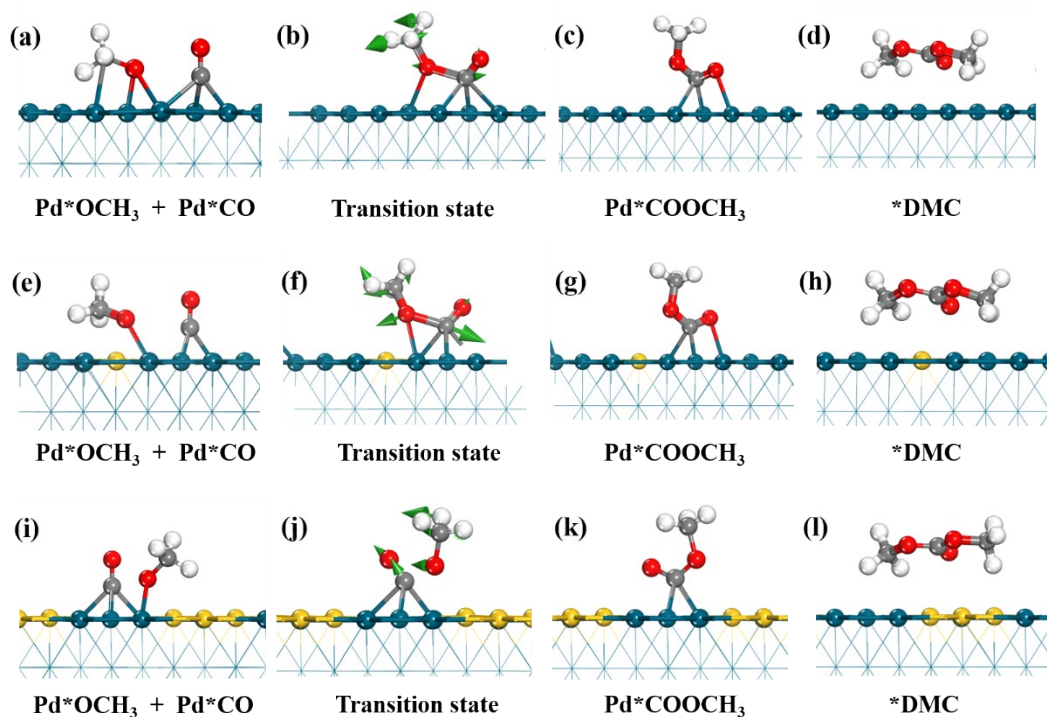

**Figure S21.** (a-d) Key reaction intermediates on Pd(111). The green arrows represent the direction of vibration of transition state. (e-h) Key reaction intermediates on AuPd-0.03. The green arrows represent the direction of vibration of transition state. (i-l) Key reaction intermediates on AuPd-0.08-cluster. The green arrows represent the direction of vibration of transition state.



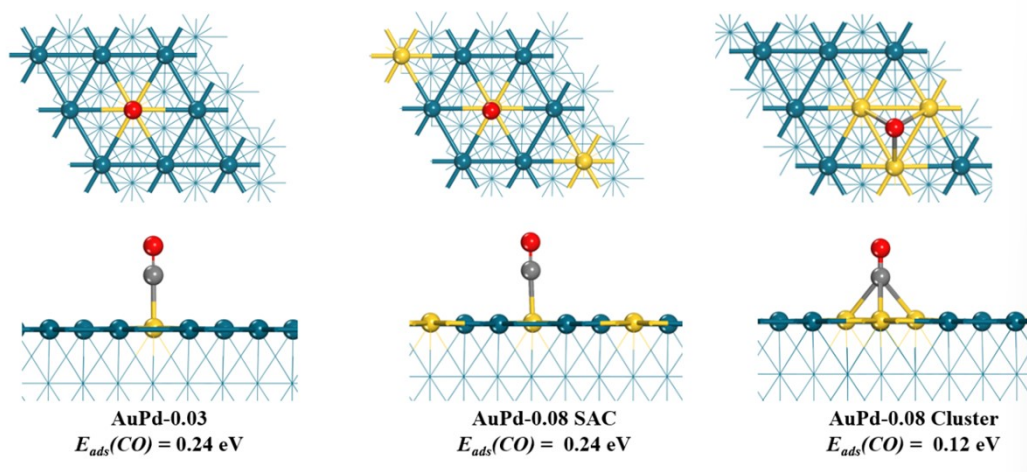

**Figure S22.** Adsorption energy of CO on the Au site at different models.

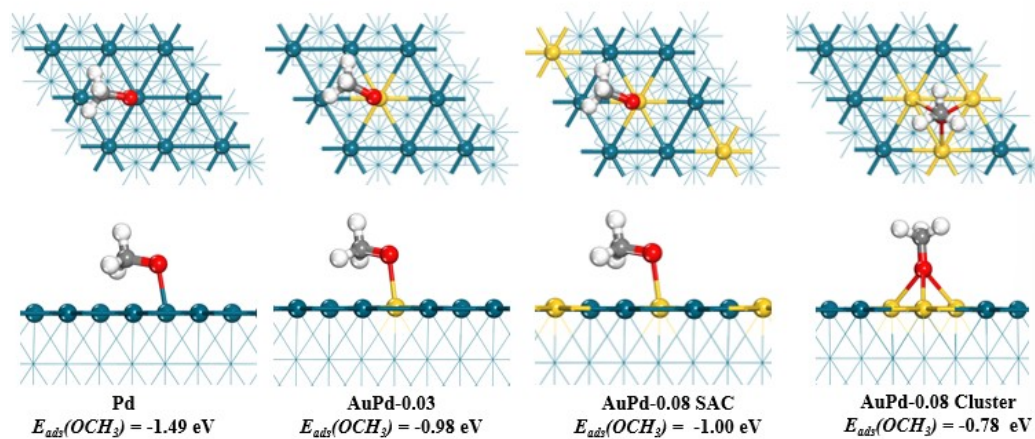

**Figure S23.** Comparison of adsorption energy of methoxide on the Pd and Au sites at different models.

**Table S1** ICP-MS testing of Au content in AuPd-0.08.

| Test elements | Sampling quantity (g) | Constant volume $V_0$ (mL) | Dilution ratio f | Element concentration in solution $C_1$ (g/kg) | Au:Pd |
|---------------|-----------------------|----------------------------|------------------|------------------------------------------------|-------|
| Au            | 0.0353                | 25                         | 50               | 156.905                                        | 0.1   |

**Table S2** Comparison of XPS before and after AuPd-0.08 electrolysis.

|                     | Name | Start BE | Peak BE | End BE | Atomic % | Au:Pd |
|---------------------|------|----------|---------|--------|----------|-------|
| Before electrolysis | Au4f | 92.5     | 83.6    | 80.92  | 1.72     | 0.083 |
|                     | Pd3d | 345.5    | 335.69  | 331.5  | 20.77    |       |
| After electrolysis  | Au4f | 92       | 84.11   | 81     | 1.12     | 0.095 |
|                     | Pd3d | 345      | 335.78  | 332.07 | 11.7     |       |

**Table S3.** Au  $L_3$ -edge EXAFS fitting results. ( $S_0^2=0.9$ )

| Sample    | Path  | $N$           | $R/\text{\AA}$  | $\sigma^2/10^{-3} \text{\AA}^2$ | $\Delta E_0/\text{eV}$ | R-factor |
|-----------|-------|---------------|-----------------|---------------------------------|------------------------|----------|
| AuPd-0.08 | Pd-Au | $8.7 \pm 0.9$ | $2.77 \pm 0.01$ | $7.49 \pm 0.49$                 | $6.14 \pm 0.83$        | 0.011    |
|           | Au-Au | $0.3 \pm 0.2$ | $2.82 \pm 0.01$ | $6.69 \pm 0.68$                 |                        |          |
| Au foil   | Au-Au | 12            | $2.86 \pm 0.01$ | $8.22 \pm 0.33$                 | $4.44 \pm 0.33$        | 0.0035   |

$N$  is the coordination number.

$R$  is the distance between absorber and backscatter atoms.

$\sigma^2$  is the Debye Waller factor.

R-factor is residual factor.

Data ranges:  $3.0 < k \leq 12.5 \text{ \AA}^{-1}$ ,  $1.0 < R \leq 3.0 \text{ \AA}$ .  $\Delta E_0$  was refined as a global fit parameter.

The number of variable parameters is 4, out of a total of 11.4(Pd) and 11.8(Au) independent points.

**Table S4** Performance comparison of electrosynthesis DMC.

| Catalyst                    | Electrosynthesis method                                                 | j(mA cm <sup>-2</sup> ) | FE(%) or Yield                                          | Reference                                   |
|-----------------------------|-------------------------------------------------------------------------|-------------------------|---------------------------------------------------------|---------------------------------------------|
| AuPd-0.08                   | Coupling of CO <sub>2</sub> and CH <sub>3</sub> OH at single cathode    | 30                      | 52.3%<br>~296<br>umol.cm <sup>-2</sup> .h <sup>-1</sup> | This work                                   |
| Pd-B                        | Coupling of CO <sub>2</sub> and CH <sub>3</sub> OH at single cathode    | 30                      | 47.5%                                                   | Chem. Eng. J. <b>2024</b> , 498, 155109.    |
| Ni<br>SAs/OMMNC+Pd/C        | Coupling of CO <sub>2</sub> and CH <sub>3</sub> OH at cathode with Pd/C | 12                      | 80%                                                     | Energy Environ. Sci., 2023,16, 502-512      |
| Co-CPY/CNTs,                | Coupling of CO <sub>2</sub> and CH <sub>3</sub> OH at cathode with Pd/C | 16                      | ~35<br>umol.cm <sup>-2</sup> .h <sup>-1</sup>           | Chem. Eng. J. 2024, 486, 150179             |
| NiPc-azo-<br>H2Pp@CNTs      | Coupling of CO <sub>2</sub> and CH <sub>3</sub> OH at cathode with Pd/C | 30                      | 6.21<br>mmol L <sup>-1</sup> .h <sup>-1</sup>           | Adv. Energy Mater. 2024, 14, 2401314        |
| Au+Pd/C                     | Coupling of CO <sub>2</sub> and CH <sub>3</sub> OH at cathode with Pd/C | 12                      | 55%                                                     | Nature Energy volume 6, pages733–741 (2021) |
| Au/carbon                   | electrosynthesis from CO at the anode                                   | 11                      | 35%                                                     | J. Phys. Chem. B 2005,109, 9140.            |
| HAuCl <sub>4</sub> /AC      | electrosynthesis from CO at the anode                                   | 2.4                     | 5.1%                                                    | J. Am. Chem. Soc. 2004, 126, 5346.          |
| Copper carbonyl             | electrosynthesis from CO at the anode                                   | 4                       | 6%                                                      | ACS Catal. 2018, 9,859.                     |
| CuCl <sub>2</sub> /graphite | electrosynthesis from CO at the anode                                   | 4.6                     | 14.5%                                                   | J. Electrochem. Soc.1995, 142, 130.         |
| PdCl <sub>2</sub> /graphite | electrosynthesis from CO at the anode                                   | 5                       | 60%                                                     | Chem. Lett. 2002, 31,448.                   |
| Pd <sub>3</sub> Cu          | electrosynthesis from CO at the anode                                   | 2.1                     | 93%                                                     | Angew. Chem. Int. Ed. 2024, e202401311.     |



**Table S5** Dissolution test of Pd and Au in the electrolyte using ICP-MS

| Test Elements | Actual sampling quantity (ml) | Constant volume V0 (mL) | Test Element Concentration C <sub>o</sub> (ug/L) | Dilution ratio f | Element concentration in solution C <sub>1</sub> (ug/L) |
|---------------|-------------------------------|-------------------------|--------------------------------------------------|------------------|---------------------------------------------------------|
| Pd            | 1                             | 10                      | 20.036                                           | 1                | 20.04                                                   |
| Au            | 1                             | 10                      | 2.498                                            | 1                | 2.5                                                     |

**Table S6** Comparison of electrosynthesis properties of different anode materials

| Anode                         | FE <sub>MF</sub> (%) | FE <sub>DMC</sub> (%) |
|-------------------------------|----------------------|-----------------------|
| <b>Carbon paper</b>           | <b>1.9</b>           | <b>52.3</b>           |
| Carbon felt                   | 13.7                 | 42.5                  |
| Carbon glass                  | 20.3                 | 47.5                  |
| Carbon paper+IrO <sub>2</sub> | 32.4                 | 33.5                  |

**Table S7** Controlling Different Variables for DMC Electrosynthesis.

| Cathode | Electrolyte            | Atmosphere      | FE <sub>DMC</sub> |
|---------|------------------------|-----------------|-------------------|
| Ni-N-C  | 0.1M NaBr              | CO <sub>2</sub> | 0                 |
| Pd NPs  | 0.1M NaBF <sub>4</sub> | CO <sub>2</sub> | 0                 |
| Pd NPs  | 0.1M NaBr              | N <sub>2</sub>  | 0                 |
